# Supplementary material for: Specific Learning Disabilities and Emotional-Behavioral Difficulties: Phenotypes and Role of the Cognitive Profile
Source: MDPI journal article supplement (doi:10.3390/jcm12051882), 2023-02-27
Supplement: s1 [file s1]

## APPENDIX

**Table S1.** *t* statistics for Bonferroni post-hoc corrections for multiple comparisons, on the Wechsler indices

| <i>WISC-IV indices</i> | <i>t</i> | <i>df</i> | <i>p</i> |
|------------------------|----------|-----------|----------|
| VCI - PRI              | -1,930   | 116       | 0,596    |
| PRI - WMI              | 10,958   | 114       | 0,000*   |
| WMI - PSI              | -3,927   | 114       | 0,000*   |
| PSI - VCI              | -4,864   | 113       | 0,000*   |
| VCI - WMI              | 10,191   | 113       | 0,000*   |
| PSI - PRI              | -6,493   | 114       | 0,000*   |

. \* represent the statistical significant differences ( $p < .05$ ) across Wechsler indices or CBCL scales.

**Table S2.** *t* statistics for Bonferroni post-hoc corrections for multiple comparisons on the CBCL DSM-oriented sub-scales

| <i>CBCL DSM-oriented sub-scales</i>                                     | <i>t</i> | <i>df</i> | <i>p</i> |
|-------------------------------------------------------------------------|----------|-----------|----------|
| Affective Problem - Anxiety Problem                                     | -3,015   | 120       | 0,047*   |
| Affective Problem - Somatic Problem                                     | 3,693    | 120       | 0,005*   |
| Affective Problem - Attention Deficit/Hyperactivity Problem             | 1,711    | 120       | 1,000    |
| Affective Problem - Oppositional Defiant Problems                       | 5,859    | 120       | 0,000*   |
| Affective Problem - Conduct Problems                                    | 7,613    | 120       | 0,000*   |
| Anxiety Problem - Somatic Problem                                       | 5,680    | 120       | 0,000*   |
| Anxiety Problem - Attention Deficit/Hyperactivity Problem               | 4,078    | 120       | 0,001*   |
| Anxiety Problem - Oppositional Defiant Problems                         | 8,049    | 120       | 0,000*   |
| Anxiety Problem - Conduct Problems                                      | 9,395    | 120       | 0,000*   |
| Somatic Problem - Attention Deficit/Hyperactivity Problem               | -2,009   | 120       | 0,701    |
| Somatic Problem - Oppositional Defiant Problems                         | 0,941    | 120       | 1,000    |
| Somatic Problem - Conduct Problems                                      | 2,943    | 120       | 0,058*   |
| Attention Deficit/Hyperactivity Problem - Oppositional Defiant Problems | 4,506    | 120       | 0,000*   |
| Attention Deficit/Hyperactivity Problem - Conduct Problems              | 7,079    | 120       | 0,000*   |
| Oppositional Defiant Problems - Conduct Problems                        | 3,639    | 120       | 0,060    |

. \* represent the statistical significant differences ( $p < .05$ ) across Wechsler indices or CBCL scales.

**Table S3.** *t* statistics for Bonferroni post-hoc corrections for multiple comparisons on the CBCL syndrome scales

| <b>CBCL syndrome subscales</b>                 | <b><i>t</i></b> | <b><i>df</i></b> | <b><i>p</i></b> |
|------------------------------------------------|-----------------|------------------|-----------------|
| Anxious/Depressed - With-drawn/Depressed       | 1,101           | 120              | 1,000           |
| Anxious/Depressed - Somatic Complaints         | 3,230           | 120              | 0,045*          |
| Anxious/Depressed - Social Problems            | 1,940           | 120              | 1,000           |
| Anxious/Depressed - Thought Problems           | 6,013           | 120              | 0,000*          |
| Anxious/Depressed - Attention Problem          | -1,297          | 120              | 1,000           |
| Anxious/Depressed - Rule Breaking Behaviour    | 6,915           | 120              | 0,000*          |
| Anxious/Depressed - Aggressive Behaviour       | 5,939           | 120              | 0,000*          |
| With-drawn/Depressed - Somatic Complaints      | 2,187           | 120              | 0,859           |
| With-drawn/Depressed - Social Problems         | 0,741           | 120              | 1,000           |
| With-drawn/Depressed - Thought Problems        | 4,090           | 120              | 0,002*          |
| With-drawn/Depressed - Attention Problem       | -2,034          | 120              | 1,000           |
| With-drawn/Depressed - Rule Breaking Behaviour | 6,255           | 120              | 0,000*          |
| With-drawn/Depressed - Aggressive Behaviour    | 4,559           | 120              | 0,000*          |
| Somatic Complaints - Social Problems           | -1,598          | 120              | 1,000           |
| Somatic Complaints - Thought Problems          | 2,232           | 120              | 0,769           |
| Somatic Complaints - Attention Problem         | -3,918          | 120              | 0,004*          |
| Somatic Complaints - Rule Breaking Behaviour   | 4,163           | 120              | 0,002*          |
| Somatic Complaints - Aggressive Behaviour      | 2,501           | 120              | 0,384           |
| Social Problems - Thought Problems             | 3,948           | 120              | 0,004*          |
| Social Problems - Attention Problem            | -3,148          | 120              | 0,580           |
| Social Problems - Rule Breaking Behaviour      | 6,609           | 120              | 0,000*          |
| Social Problems - Aggressive Behaviour         | 4,616           | 120              | 0,000*          |
| Thought Problems - Attention Problem           | -6,006          | 120              | 0,000*          |
| Thought Problems - Rule Breaking Behaviour     | 2,356           | 120              | 0,563           |
| Thought Problems - Aggressive Behaviour        | 0,362           | 120              | 1,000           |
| Attention Problem - Rule Breaking Behaviour    | 8,847           | 120              | 0,000*          |
| Attention Problem - Aggressive Behaviour       | 7,312           | 120              | 0,000*          |
| Rule Breaking Behaviour - Aggressive Behaviour | -2,814          | 120              | 0,160           |

. \* represent the statistical significant differences ( $p < .05$ ) across Wechsler indices or CBCL scales.
